# Supplementary material
Source: ML conference proceedings conference paper supplement (https://openaccess.thecvf.com/content/CVPR_2019/html/Schwartz_A_Simple_Baseline_CVPR_2019_paper.html)
Supplement: Supplementary file 1 [file Schwartz_A_Simple_Baseline_CVPR_2019_supplemental.pdf]

# **Supplementary Material: A Simple Baseline for Audio-Visual Scene-Aware Dialog**

Idan Schwartz<sup>1</sup>, Alexander Schwing<sup>2</sup>, Tamir Hazan<sup>1</sup>  
<sup>1</sup>Technion <sup>2</sup>UIUC

`idanschwartz@gmail.com, aschwing@illinois.edu, tamir.hazan@technion.ac.il`

In this supplementary we present additional qualitative results in Fig. 1. We observe the attention to focus on the unique aspects of the video.

## **References**

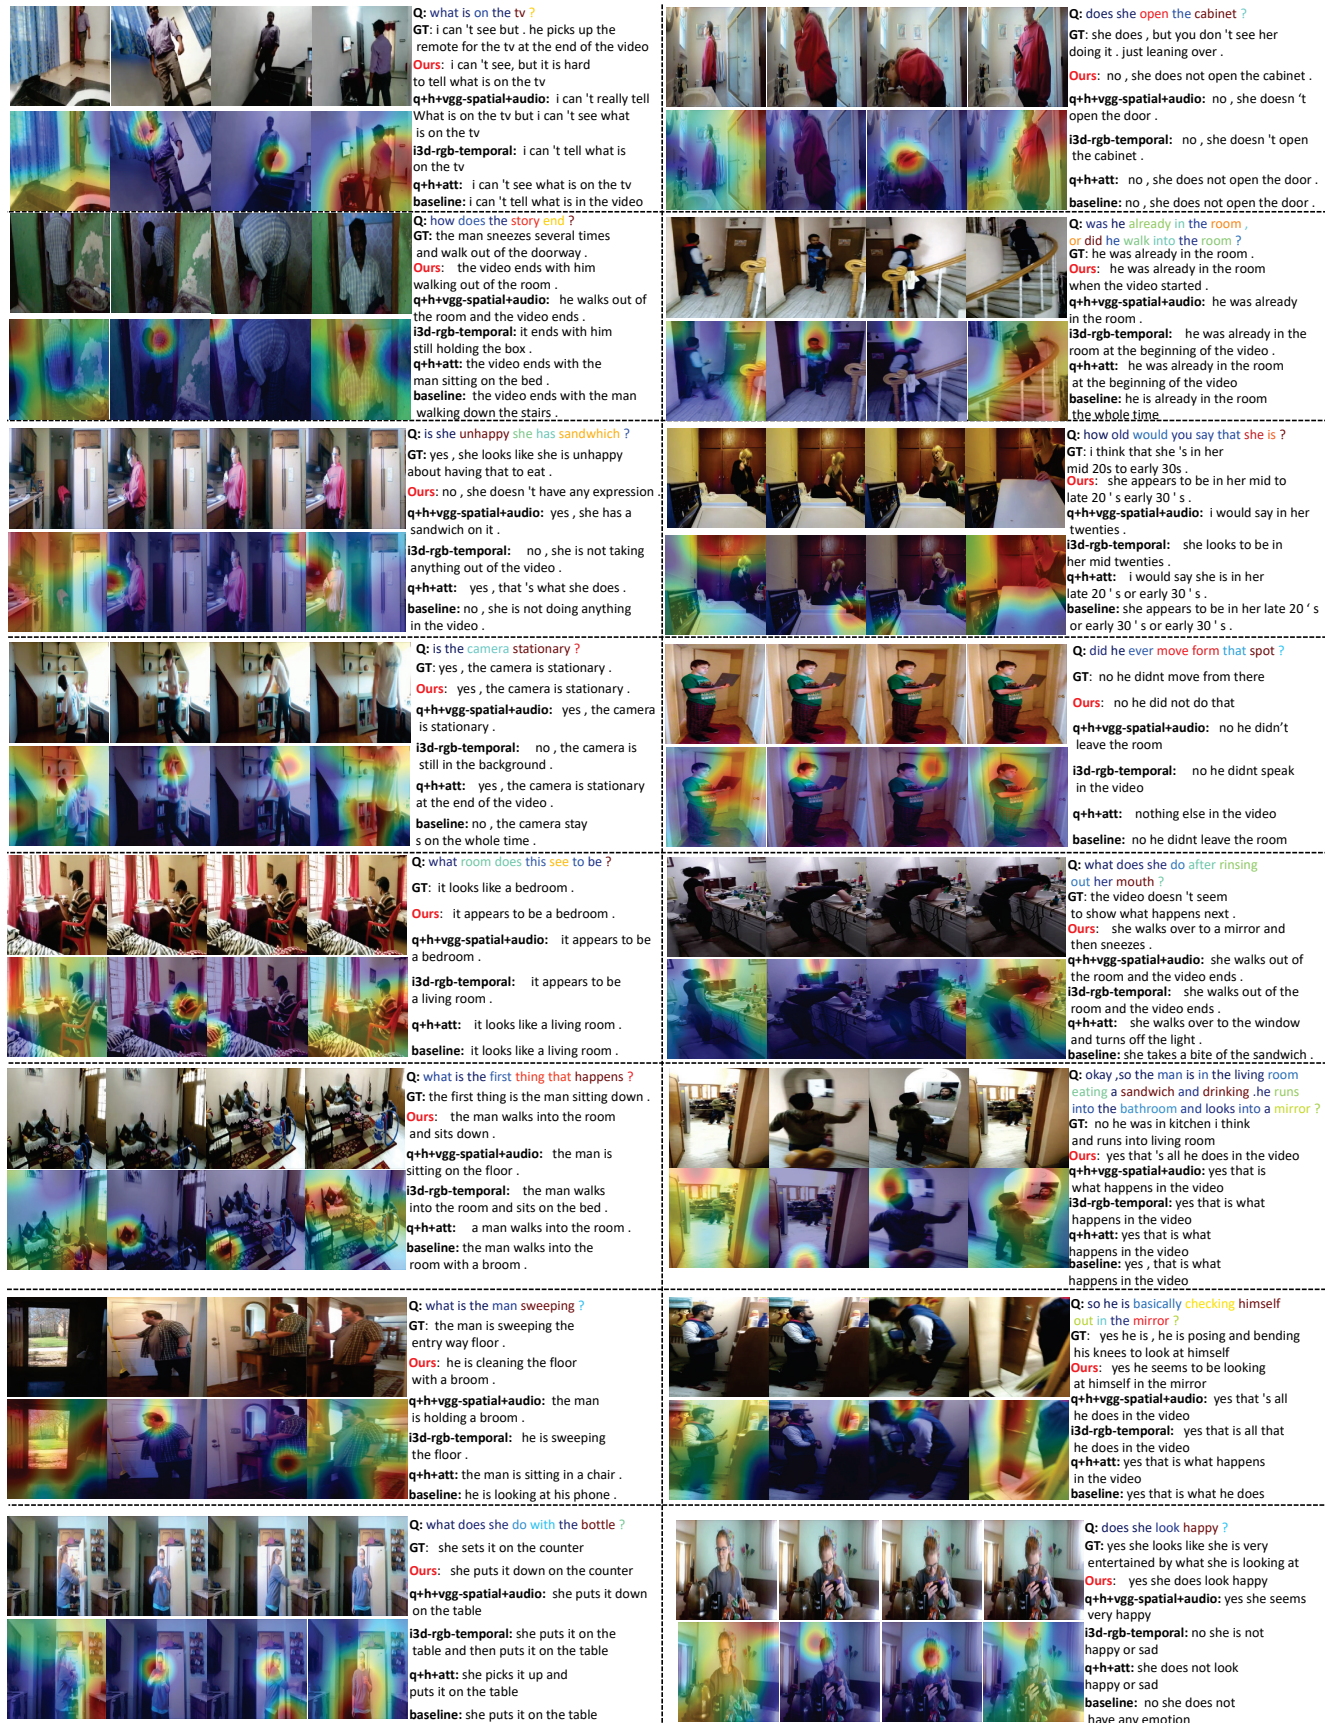

Figure 1: Additional qualitative results.
